# Supplementary material for: The cell rejuvenation atlas: leveraging network biology to identify master regulators of rejuvenation strategies
Source: publisher site journal article supplement (doi:10.18632/aging.206105), 2024-09-09
Supplement: Supplementary file [file aging-v16i17-206105-supplementary-material-SD2.pdf]

## SUPPLEMENTARY TABLES

**Supplementary Table 1. GEO and GSA accession numbers of datasets used in this study.**

| Dataset             | Accession number |
|---------------------|------------------|
| Calorie Restriction | GSE137869        |
| Exercise            | CRA007207        |
| Metformin           | GSE194386        |
| Parabiosis1         | GSE193093        |
| Parabiosis2         | CRA004660        |
| Parabiosis3         | GSE222510        |
| Rapamycin/Metformin | GSE210669        |
| Reprogramming       | GSE144600        |
| Reprogramming2      | GSE176206        |

**Supplementary Table 2. Mapping of gene set names (column “Long name”) to their corresponding abbreviation (column “Short name”).**

| Long name                                                                                  | Short name            |
|--------------------------------------------------------------------------------------------|-----------------------|
| TABULA_MURIS_SENIS_LUNG_B_CELL_AGEING                                                      | Bcell aging           |
| TABULA_MURIS_SENIS_HEART_AND_AORTA_FIBROBLAST_OF_CARDIAC_TISSUE_AGEING                     | Cardiac aging         |
| TABULA_MURIS_SENIS_SPLEEN_PROERYTHROBLAST_AGEING                                           | Proerythroblast aging |
| TABULA_MURIS_SENIS_MARROW_PRECURSOR_B_CELL_AGEING                                          | Hsc Bell aging        |
| TABULA_MURIS_SENIS_KIDNEY_KIDNEY_LOOP_OF_HENLE_THICK_ASCENDING_LIMB_EPITHELIAL_CELL_AGEING | Kidney aging          |
| TABULA_MURIS_SENIS_MARROW_HEMATOPOIETIC_PRECURSOR_CELL_AGEING                              | Bm precursor aging    |
| TABULA_MURIS_SENIS_MAMMARY_GLAND_STROMAL_CELL_AGEING                                       | Stromal aging         |
| TABULA_MURIS_SENIS_MAMMARY_GLAND_BASAL_CELL_AGEING                                         | Basal cell aging      |
| TABULA_MURIS_SENIS_MAMMARY_GLAND_LUMINAL_EPITHELIAL_CELL_OF_MAMMARY_GLAND_AGEING           | Epithelial aging      |
| TABULA_MURIS_SENIS_BRAIN_NON_MYELOID_NEURON_AGEING                                         | Neuron aging          |
| TABULA_MURIS_SENIS_GONADAL_ADIPOSE_TISSUE_MYELOID_CELL_AGEING                              | Myeloid aging         |
| TABULA_MURIS_SENIS_MAMMARY_GLAND_T_CELL_AGEING                                             | Tcell aging           |
| TABULA_MURIS_SENIS_LIMB_MUSCLE_MESENCHYMAL_STEM_CELL_AGEING                                | Mesenchymal aging     |
| TABULA_MURIS_SENIS_SKIN_BULGE KERATINOCYTE_AGEING                                          | Skin aging            |
| TABULA_MURIS_SENIS_BRAIN_MYELOID_MACROPHAGE_AGEING                                         | Macrophage aging      |
| TABULA_MURIS_SENIS_SPLEEN_MATURE_NK_T_CELL_AGEING                                          | Nkcell aging          |
| TABULA_MURIS_SENIS_MARROW_NAIVE_B_CELL_AGEING                                              | Bm Bcell aging        |
| TABULA_MURIS_SENIS_LUNG_NON_CLASSICAL_MONOCYTE_AGEING                                      | Monocyte aging        |
| TABULA_MURIS_SENIS_GONADAL_ADIPOSE_TISSUE_MESENCHYMAL_STEM_CELL_OF_ADIPOSE_AGEING          | AdiMes aging          |
| TABULA_MURIS_SENIS_SPLEEN_T_CELL_AGEING                                                    | SpleenTc aging        |
| TABULA_MURIS_SENIS_HEART_ATRIAL_MYOCYTE_AGEING                                             | Myocyte aging         |
| TABULA_MURIS_SENIS_THYMUS_THYMOCYTE_AGEING                                                 | Thymus Tc Aging       |

|                                                                       |                    |
|-----------------------------------------------------------------------|--------------------|
| TABULA_MURIS_SENIS_LARGE_INTESTINE_LARGE_INTESTINE_GOBLET_CELL_AGEING | Goblet aging       |
| TABULA_MURIS_SENIS_SPLEEN_PROERYTHROBLAST_AGEING                      | Eryth Spleen aging |
| TABULA_MURIS_SENIS_LUNG_B_CELL_AGEING                                 | Lung Bc aging      |
| TABULA_MURIS_SENIS_LUNG_B_CELL_AGEING                                 | LungBc aging       |
| TABULA_MURIS_SENIS_SPLEEN_MACROPHAGE_AGEING                           | Spleen Mcr Aging   |
| TABULA_MURIS_SENIS_SPLEEN GRANULOCYTE_AGEING                          | Spleen Gran Aging  |
| TABULA_MURIS_SENIS_LUNG_INTERMEDIATE_MONOCYTE_AGEING                  | Lung Mon Aging     |
| TABULA_MURIS_SENIS_SPLEEN_B_CELL_AGEING                               | Spleen Bc Aging    |

**Supplementary Table 3. Average age predictions from MultiTimer after mock treatment (column “Control\_Avg\_Age”) or TF inhibition or upregulation (column “Experimental\_Avg\_Age”). Positive and negative age differences (Age\_Difference) correspond to a pro- and anti-aging effect, respectively.**

| GSE Series | CellType                  | Method             | Gene        | Control_Avg_Age  | Experimental_Avg_Age | Age_Difference    |
|------------|---------------------------|--------------------|-------------|------------------|----------------------|-------------------|
| GSE114284  | BEAS-2B                   | ko                 | IRF1 + IFNB | 30.4647042486172 | 34.3877386364404     | 3.92303438782321  |
| GSE140026  | M0 Macrophages            | ko                 | ATF4        | 29.1668560993142 | 27.4402233049184     | -1.7266327943958  |
| GSE140026  | M1 Macrophages            | ko                 | ATF4        | 59.5196662856039 | 57.7682136158112     | -1.75145266979273 |
| GSE140026  | M2 Macrophages            | ko                 | ATF4        | 50.9511918034666 | 48.4115306709847     | -2.53966113248191 |
| GSE140990  | NHK                       | siRNA              | KLF4        | 32.7457159077375 | 41.8536621191276     | 9.10794621139004  |
| GSE56989   | Primary human macrophages | siRNA              | HIF1A       | 42.2828591457769 | 44.9064838639297     | 2.62362471815279  |
| GSE73550   | Endometrial stromal cells | siRNA              | ESR1        | 29.9029503299127 | 27.8938114659652     | -2.00913886394748 |
| GSE90982   | HUVECs                    | knockin/upregulate | KLF4        | 33.6684708599789 | 35.3380624939053     | 1.66959163392637  |
| GSE106502  | MCF10A                    | knockin/upregulate | MYC         | 41.4889946189905 | 31.7056828632328     | -9.78331175575767 |

**Supplementary Table 4. Gene set enrichment results for the signaling cascade including the intermediate *Gnai2* and master regulators *Fos* and *Cebpb* in bone marrow macrophages after parabiosis treatment.**

| geneSet                                           | Normalized EnrichmentScore | FDR                | size | userId                                                                                                      | Set collection origin |
|---------------------------------------------------|----------------------------|--------------------|------|-------------------------------------------------------------------------------------------------------------|-----------------------|
| Spleen Proerythroblast Ageing                     | -1.89681927021782          | 0.0480488114910385 | 19   | Atf4;Bsg;Cdk4;Cited2;Emd;Gapdh;Hmgb1;Hsp90aa1;Hspa5;Ldha;Pgk1;Prdx3;Rbbp7;Sdhb;Sod1;Stmn1;Top1;Tuba1b;U2af1 | Cell type signature   |
| Marrow Precursor B Cell Ageing                    | -1.83316975080196          | 0.0468624210838524 | 6    | Akr1a1;Bsg;Fth1;Gapdh;Hmgb1;Sdhb                                                                            | Cell type signature   |
| nucleoside monophosphate metabolic process        | -2.13758989447581          | 0.0084662592850568 | 5    | Hif1a;Hspa8;Ldha;Pgk1;Stat3                                                                                 | GO enrichment         |
| purine nucleoside monophosphate metabolic process | -2.13758989447581          | 0.0084662592850568 | 5    | Hif1a;Hspa8;Ldha;Pgk1;Stat3                                                                                 | GO enrichment         |
| nucleoside triphosphate metabolic process         | -2.13758989447581          | 0.0084662592850568 | 5    | Hif1a;Hspa8;Ldha;Pgk1;Stat3                                                                                 | GO enrichment         |

|                                                       |                   |                     |    |                                         |                    |
|-------------------------------------------------------|-------------------|---------------------|----|-----------------------------------------|--------------------|
| purine nucleoside triphosphate metabolic process      | -2.13758989447581 | 0.0084662592850568  | 5  | Hif1a;Hspa8;Ldha;Pgk1;Stat3             | GO enrichment      |
| ribonucleoside monophosphate metabolic process        | -2.13758989447581 | 0.0084662592850568  | 5  | Hif1a;Hspa8;Ldha;Pgk1;Stat3             | GO enrichment      |
| purine ribonucleoside monophosphate metabolic process | -2.13758989447581 | 0.0084662592850568  | 5  | Hif1a;Hspa8;Ldha;Pgk1;Stat3             | GO enrichment      |
| ribonucleoside triphosphate metabolic process         | -2.13758989447581 | 0.0084662592850568  | 5  | Hif1a;Hspa8;Ldha;Pgk1;Stat3             | GO enrichment      |
| purine ribonucleoside triphosphate metabolic process  | -2.13758989447581 | 0.0084662592850568  | 5  | Hif1a;Hspa8;Ldha;Pgk1;Stat3             | GO enrichment      |
| ATP metabolic process                                 | -2.13758989447581 | 0.0084662592850568  | 5  | Hif1a;Hspa8;Ldha;Pgk1;Stat3             | GO enrichment      |
| HALLMARK_OXIDATIVE_PHOSPHORYLATION                    | -1.95707927282095 | 0.021953896816685   | 6  | Atp6ap1;Cox17;Dlst;Ldha;Prdx3;Sdhb      | Hallmark gene sets |
| WP_NUCLEAR_RECEPTORS                                  | 1.74347968154799  | 0.0457183805087782  | 5  | Nr1d2;Nr4a1;Nr4a2;Rora                  | Wikipathways       |
| regulation of chemotaxis                              | 1.83367371500472  | 0.0328649544320262  | 9  | Ccl4;Dusp1;Il1b;Vegfa                   | GO enrichment      |
| regulation of leukocyte chemotaxis                    | 1.8567723688262   | 0.0242731163447965  | 8  | Ccl4;Dusp1;Il1b;Vegfa                   | GO enrichment      |
| granulocyte migration                                 | 1.883399693367    | 0.0142310469350107  | 9  | Ccl4;Cxcl2;Il1b;Vegfa                   | GO enrichment      |
| granulocyte chemotaxis                                | 1.883399693367    | 0.0142310469350107  | 9  | Ccl4;Cxcl2;Il1b;Vegfa                   | GO enrichment      |
| leukocyte migration                                   | 1.92899710894569  | 0.00678761916024705 | 11 | Ccl4;Cxcl2;Dusp1;Il1b;Vegfa             | GO enrichment      |
| regulation of signaling receptor activity             | 1.95289017271554  | 0.00430374403276534 | 8  | Ccl4;Cxcl2;Il1b;Osm;Vegfa               | GO enrichment      |
| taxis                                                 | 1.971841009153    | 0.00247895656287284 | 16 | Ccl4;Cxcl2;Dusp1;Il1b;Nr4a1;Nr4a3;Vegfa | GO enrichment      |
| leukocyte chemotaxis                                  | 1.98973358621909  | 0.0025822464196592  | 10 | Ccl4;Cxcl2;Dusp1;Il1b;Vegfa             | GO enrichment      |
| myeloid leukocyte migration                           | 1.98973358621909  | 0.0025822464196592  | 10 | Ccl4;Cxcl2;Dusp1;Il1b;Vegfa             | GO enrichment      |
| cell chemotaxis                                       | 1.99034656241804  | 0.00516449283931841 | 11 | Ccl4;Cxcl2;Dusp1;Il1b;Nr4a1;Vegfa       | GO enrichment      |
| chemotaxis                                            | 2.00570057656868  | 0.00619739140718209 | 15 | Ccl4;Cxcl2;Dusp1;Il1b;Nr4a1;Nr4a3;Vegfa | GO enrichment      |
